# Supplementary material for: A Pilot Multisensory Approach for Emotional Eating: Pivoting from VR to a 2-D Telemedicine Intervention during the Pandemic
Source: Preprints.org preprint supplement (doi:10.20944/preprints202310.2097.v1), 2023-11-01
Supplement: Supplementary file 1 [file supplementary]

**Appendix A**

**Supplementary material**

Supplementary Table 1. Summary of VR Intervention’s sessions

| **Emotion Regulation Sessions** |
| --- |
| Introduction to the first two immersive experiences (5 minutes for session) |
| Focus on Attention exercise (5 minutes) |
| VR Scenarios: The Secret Garden; The Waterfall and the Prairie (8 minutes each) |
| Identification of the safe place (5 minutes) |
| Anchoring the New Somatic Marker (10 minutes) |
| Homework (3 minutes) |
| **Emotional Rescripting sessions** |
| Check in & review homework (5 minutes) |
| Assessment: Therapist Note (5 minutes) |
| Brief Introduction to Rescripting Immersive Experiences (5 minutes) |
| Focus on Attention exercise (5 minutes) |
| VR Scenarios: The Desert and the Oasis Experience; The Mountain and the Backpack; The Boat and the Sea; The Hero and the Dragon (10-11 minutes each) |
| Emotion Evaluation (10 minutes) |
| Anchoring the New Somatic Marker (10 minutes) |
| Homework (5 minutes) |
